# Supplementary material for: Investigating the correlation between the protein adhesion simulation and the biocompatibility of polymeric substrate for skin-tissue-engineering applications
Source: Royal Society of Chemistry journal article supplement (doi:10.1039/d2cp05763h), 2023-01-01
Supplement: d2cp05763h1.pdf [file d2cp05763h1.pdf]

**Supporting Information for**

**Investigating the correlation between the protein adhesion  
simulation and the biocompatibility of polymeric substrate for  
skin tissue engineering applications**

Saeed Seifi <sup>a,b,1</sup>, Mohammad Ali Bakhtiari <sup>a,b,1</sup>, Hossein Shaygani <sup>a,b,1</sup>, Amir Shamloo <sup>a,b,\*</sup>,

Aram Almasi-Jaf <sup>a</sup>

<sup>a</sup> School of Mechanical Engineering, Sharif University of Technology, Tehran, Iran

<sup>b</sup> Stem Cell and Regenerative Medicine Institute, Sharif University of Technology,  
Tehran, Iran

<sup>1</sup>Equal contribution

*\*Corresponding Author: Dr. A. Shamloo, School of Mechanical Engineering, Sharif University of  
Technology, Azadi Ave., Tehran, IRAN, Tel: 98-21-66165691, Fax: 98-21-66165599, email:  
[shamloo@sharif.edu](mailto:shamloo@sharif.edu)*

1

## 2 Geometry optimization of the systems

3

**Table S1.** The geometry optimization task carried out throughout the simulations.

|                                 |           |
|---------------------------------|-----------|
| Algorithm                       | Smart     |
| Energy ( $kcal/mol$ )           | $10^{-3}$ |
| Force ( $kcal/mol/\text{\AA}$ ) | 0.5       |

4

5 **Table S1** shows the criterias selected for the Geometry optimizaion task in Materials Studio's  
 6 Forcite module. This task helps to change and optimize the geometry of the structre  
 7 according to the chosen criterias, energy and force in this case. This process continues until  
 8 either the final iteretion or the criterias are reached. Hence, a successful task result in a  
 9 substrate with the minimum potential energy.

## 10 Polymer surface and bulk substrate annealing

11

12

**Table S2.** The anneal task carried out on the unit polymerics surface.

|                                |           |
|--------------------------------|-----------|
| Annealing cycles               | 2         |
| Initial temperatures ( $K$ )   | 298       |
| Mid-cycle temperature ( $K$ )  | 450       |
| Ensemble                       | NVT       |
| Thermostat                     | Berendsen |
| Time step ( $fs$ )             | 1         |
| Total simulation time ( $ns$ ) | 2         |

13

14

**Table S3.** The anneal task carried out on the bulk polymerics surface.

|                               |           |
|-------------------------------|-----------|
| Annealing cycles              | 2         |
| Initial temperatures ( $K$ )  | 298       |
| Mid-cycle temperature ( $K$ ) | 450       |
| Ensemble                      | NVT       |
| Thermostat                    | Berendsen |

|                                |     |
|--------------------------------|-----|
| Time step ( $fS$ )             | 1   |
| Total simulation time ( $nS$ ) | 3.5 |

**Table S2 and S3** shows the criteria for unit and bulk polymeric cell, respectively. Since using the Geometry optimization task might cause the structure to be trapped in a local energy minimum and finishing the simulation prematurely, utilizing the Anneal task will search for the minimum energy of the structure in a much wider range by increasing and then decreasing the temperature of the substrate controlled via a selected thermostat.

## Dynamics simulation parameters carried out on the protein-polymer system

**Table S4.** The final molecular dynamics run carried out on the protein-polymer surface.

|                                |           |
|--------------------------------|-----------|
| Ensemble                       | NVT       |
| Thermostat                     | Berendsen |
| Temperature ( $K$ )            | 310       |
| Time step ( $fS$ )             | 1         |
| Total simulation time ( $nS$ ) | 2.5       |

After placing the protein near the relaxed polymeric surface, a Dynamics task will be carried out **Table S4**. In this task the structures will move according to the computed forces and factors like temperature controlled via a thermostat and the selected ensemble.

## Lattice parameters of Polymer surface and bulk substrate

**Table S5.** the lattice parameters of constructed unit and bulk polymer surfaces.

| Samples            | Unit models                                                    | Bulk models                                                      |
|--------------------|----------------------------------------------------------------|------------------------------------------------------------------|
| Lattice dimensions | $43.092\text{\AA} \times 43.092\text{\AA} \times 20\text{\AA}$ | $129.275\text{\AA} \times 129.275\text{\AA} \times 20\text{\AA}$ |

1 The lattice parameters of unit cells with periodic boundary condition constructed by assembling the  
2 polymer oligomers together. Furthermore, the bulk models were created by assembling the fabricated  
3 the unit cells next to each other in the  $x-y$  plane.

#### 4 Berendsen thermostat

5 The Berendsen method utilizes an external bath with constant temperature or pressure with adjustable  
6 time constants. Here, the gradual heat transfer between the selected structure and the environment  
7 which is governed by the temperature scaling factor ( $\lambda$ ) (Eq. S1).

$$\lambda = \sqrt{1 - \frac{\Delta t}{\tau} \left( \frac{T_{instant} - T_0}{T_{instant}} \right)} \quad (\text{Eq. S1})$$

8 Where  $\Delta t$ ,  $\tau$ ,  $T_{instant}$ , and  $T_0$  corresponds to time step, relaxation time, instantaneous temperature, and  
9 target temperature. This method allows for an accurate constant-temperature ensemble and can be  
10 expanded to polyatomic molecules [1].

#### 11 Total energy of the simulated protein-polymer systems

12 *Table S6. The total energy of the simulated protein-polymer systems*

|                 | $E_{\text{non-bonded}}$ ( $\frac{\text{Kcal}}{\text{mol}}$ ) |             | $E_{\text{H-bond}}$ ( $\frac{\text{Kcal}}{\text{mol}}$ ) |             | $E_{\text{van der Waals}}$ ( $\frac{\text{Kcal}}{\text{mol}}$ ) |             |
|-----------------|--------------------------------------------------------------|-------------|----------------------------------------------------------|-------------|-----------------------------------------------------------------|-------------|
|                 | Collagen                                                     | Fibronectin | Collagen                                                 | Fibronectin | Collagen                                                        | Fibronectin |
| <b>CH/G-1:3</b> | 387.193                                                      | 180.900     | -11.118                                                  | -7.372      | 376.075                                                         | 173.528     |
| <b>CH/G-1:2</b> | 365.438                                                      | 182.775     | -3.500                                                   | -17.244     | 361.938                                                         | 165.531     |
| <b>CH/G-1:1</b> | 347.983                                                      | 151.122     | -21.230                                                  | -17.345     | 326.753                                                         | 133.777     |
| <b>CH/G-3:1</b> | 428.634                                                      | 226.194     | -10.372                                                  | -34.229     | 418.262                                                         | 191.965     |
| <b>CH/G-2:1</b> | 410.120                                                      | 237.332     | -10.281                                                  | -18.342     | 399.839                                                         | 218.99      |

13

14

#### 15 References

1

- 2 1. Berendsen, H.J., et al., *Molecular dynamics with coupling to an external bath*. The Journal of  
3 chemical physics, 1984. **81**(8): p. 3684-3690.

4
